# Supplementary figures and images for: Molecular phylogenetics and species-level systematics of Baylisascaris
Source: PubMed Central journal article supplement — Int J Parasitol Parasites Wildl. 2018 Oct 22;7(3):450–62. doi: 10.1016/j.ijppaw.2018.09.010 (PMC6275171; doi:10.1016/j.ijppaw.2018.09.010), 2018-10-22

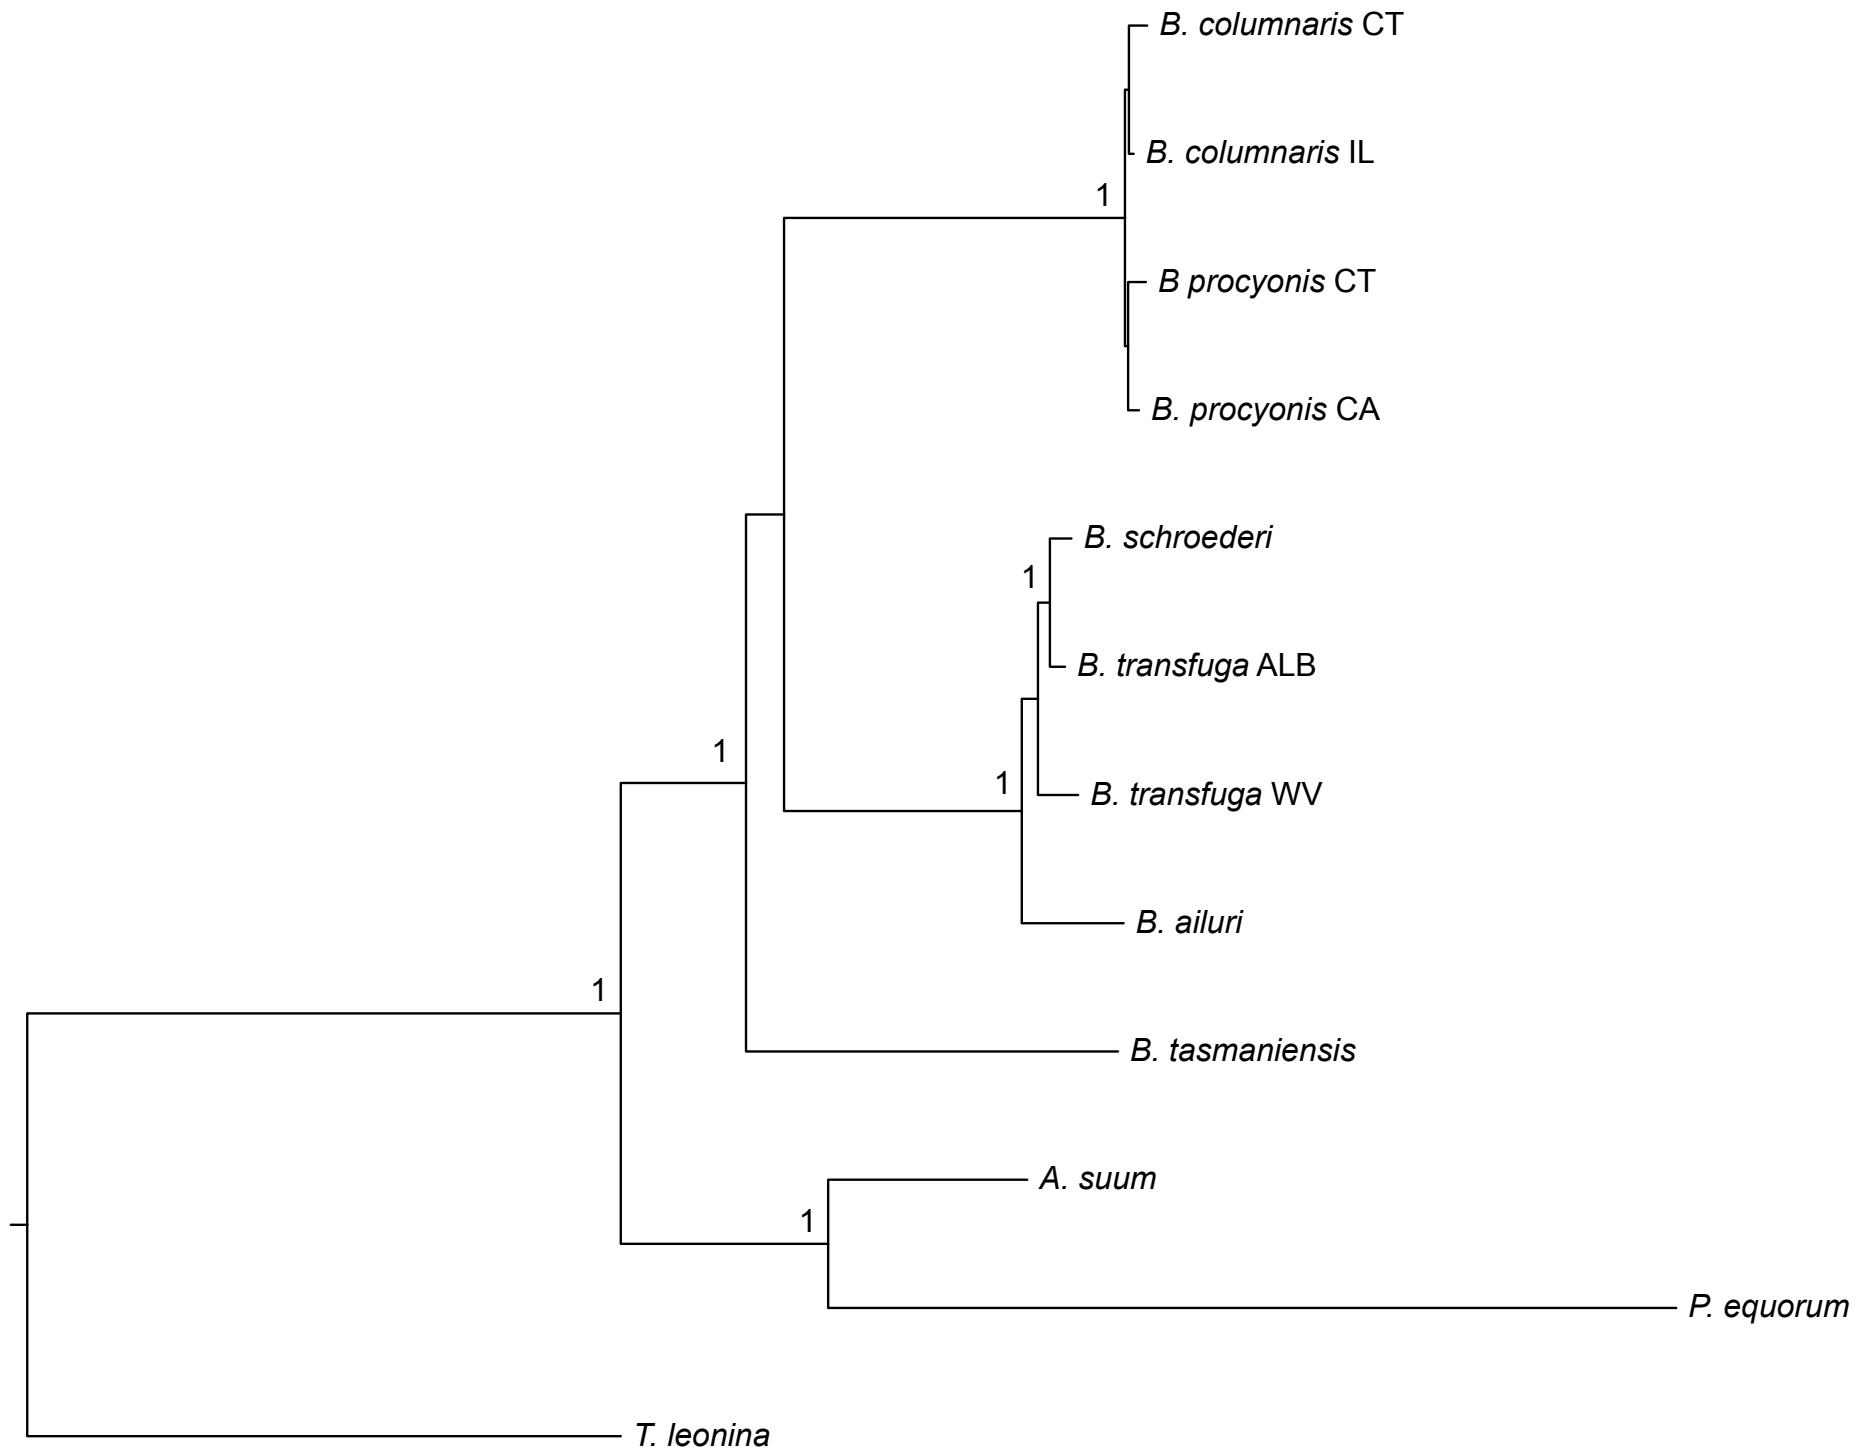

0.04

Supplement: mmc1.pdf [file mmc1.pdf]

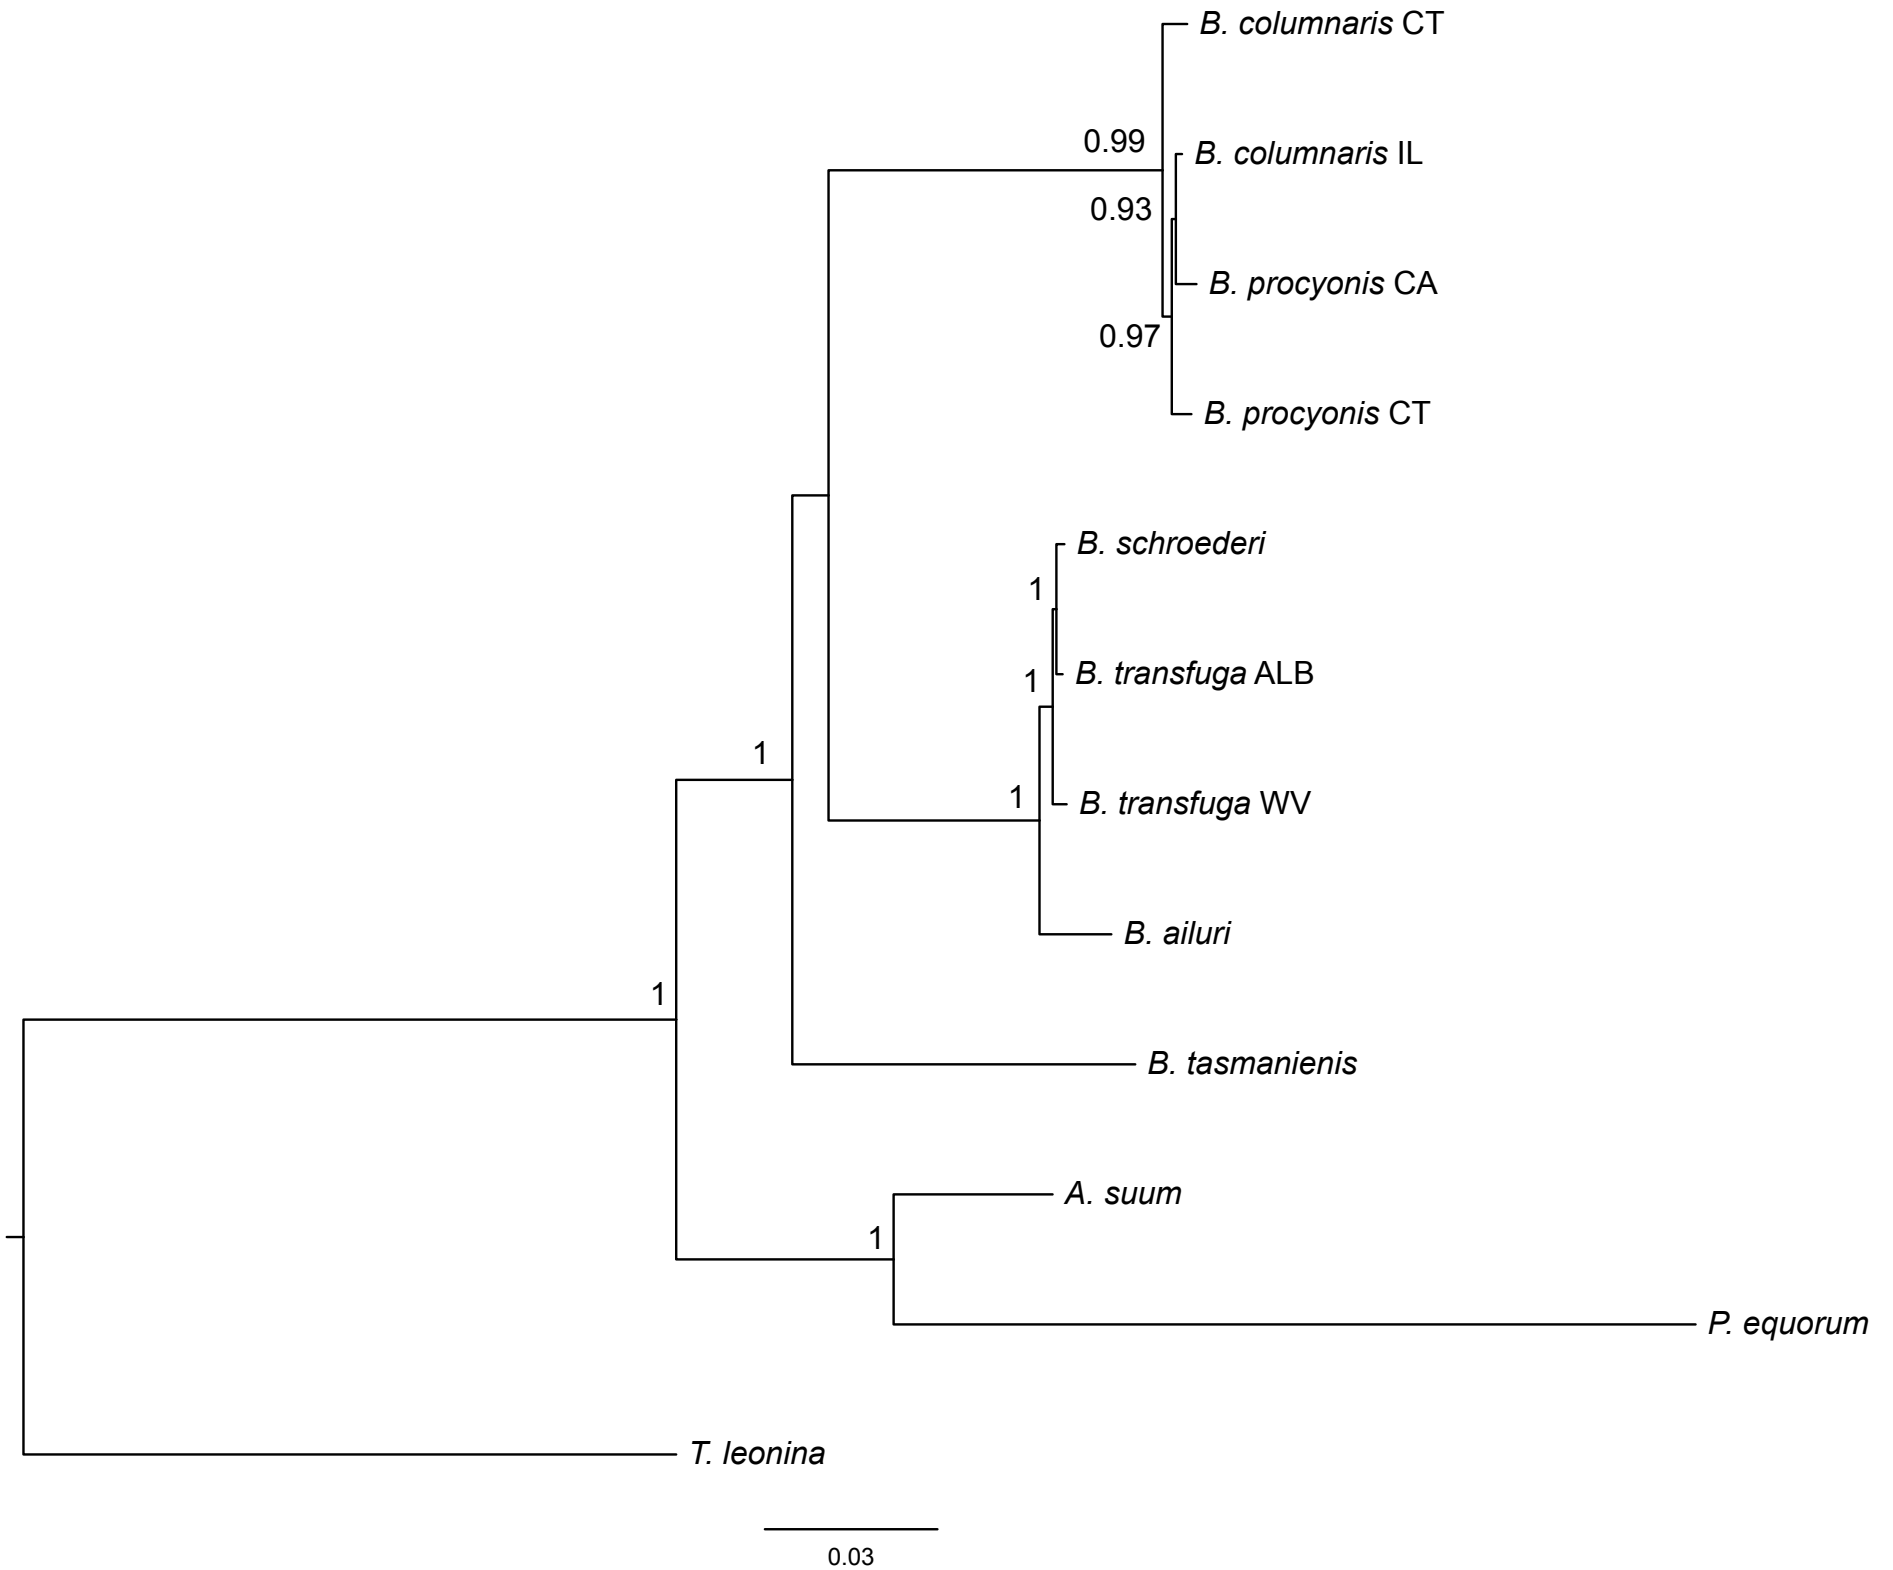

Supplement: mmc2.pdf [file mmc2.pdf]

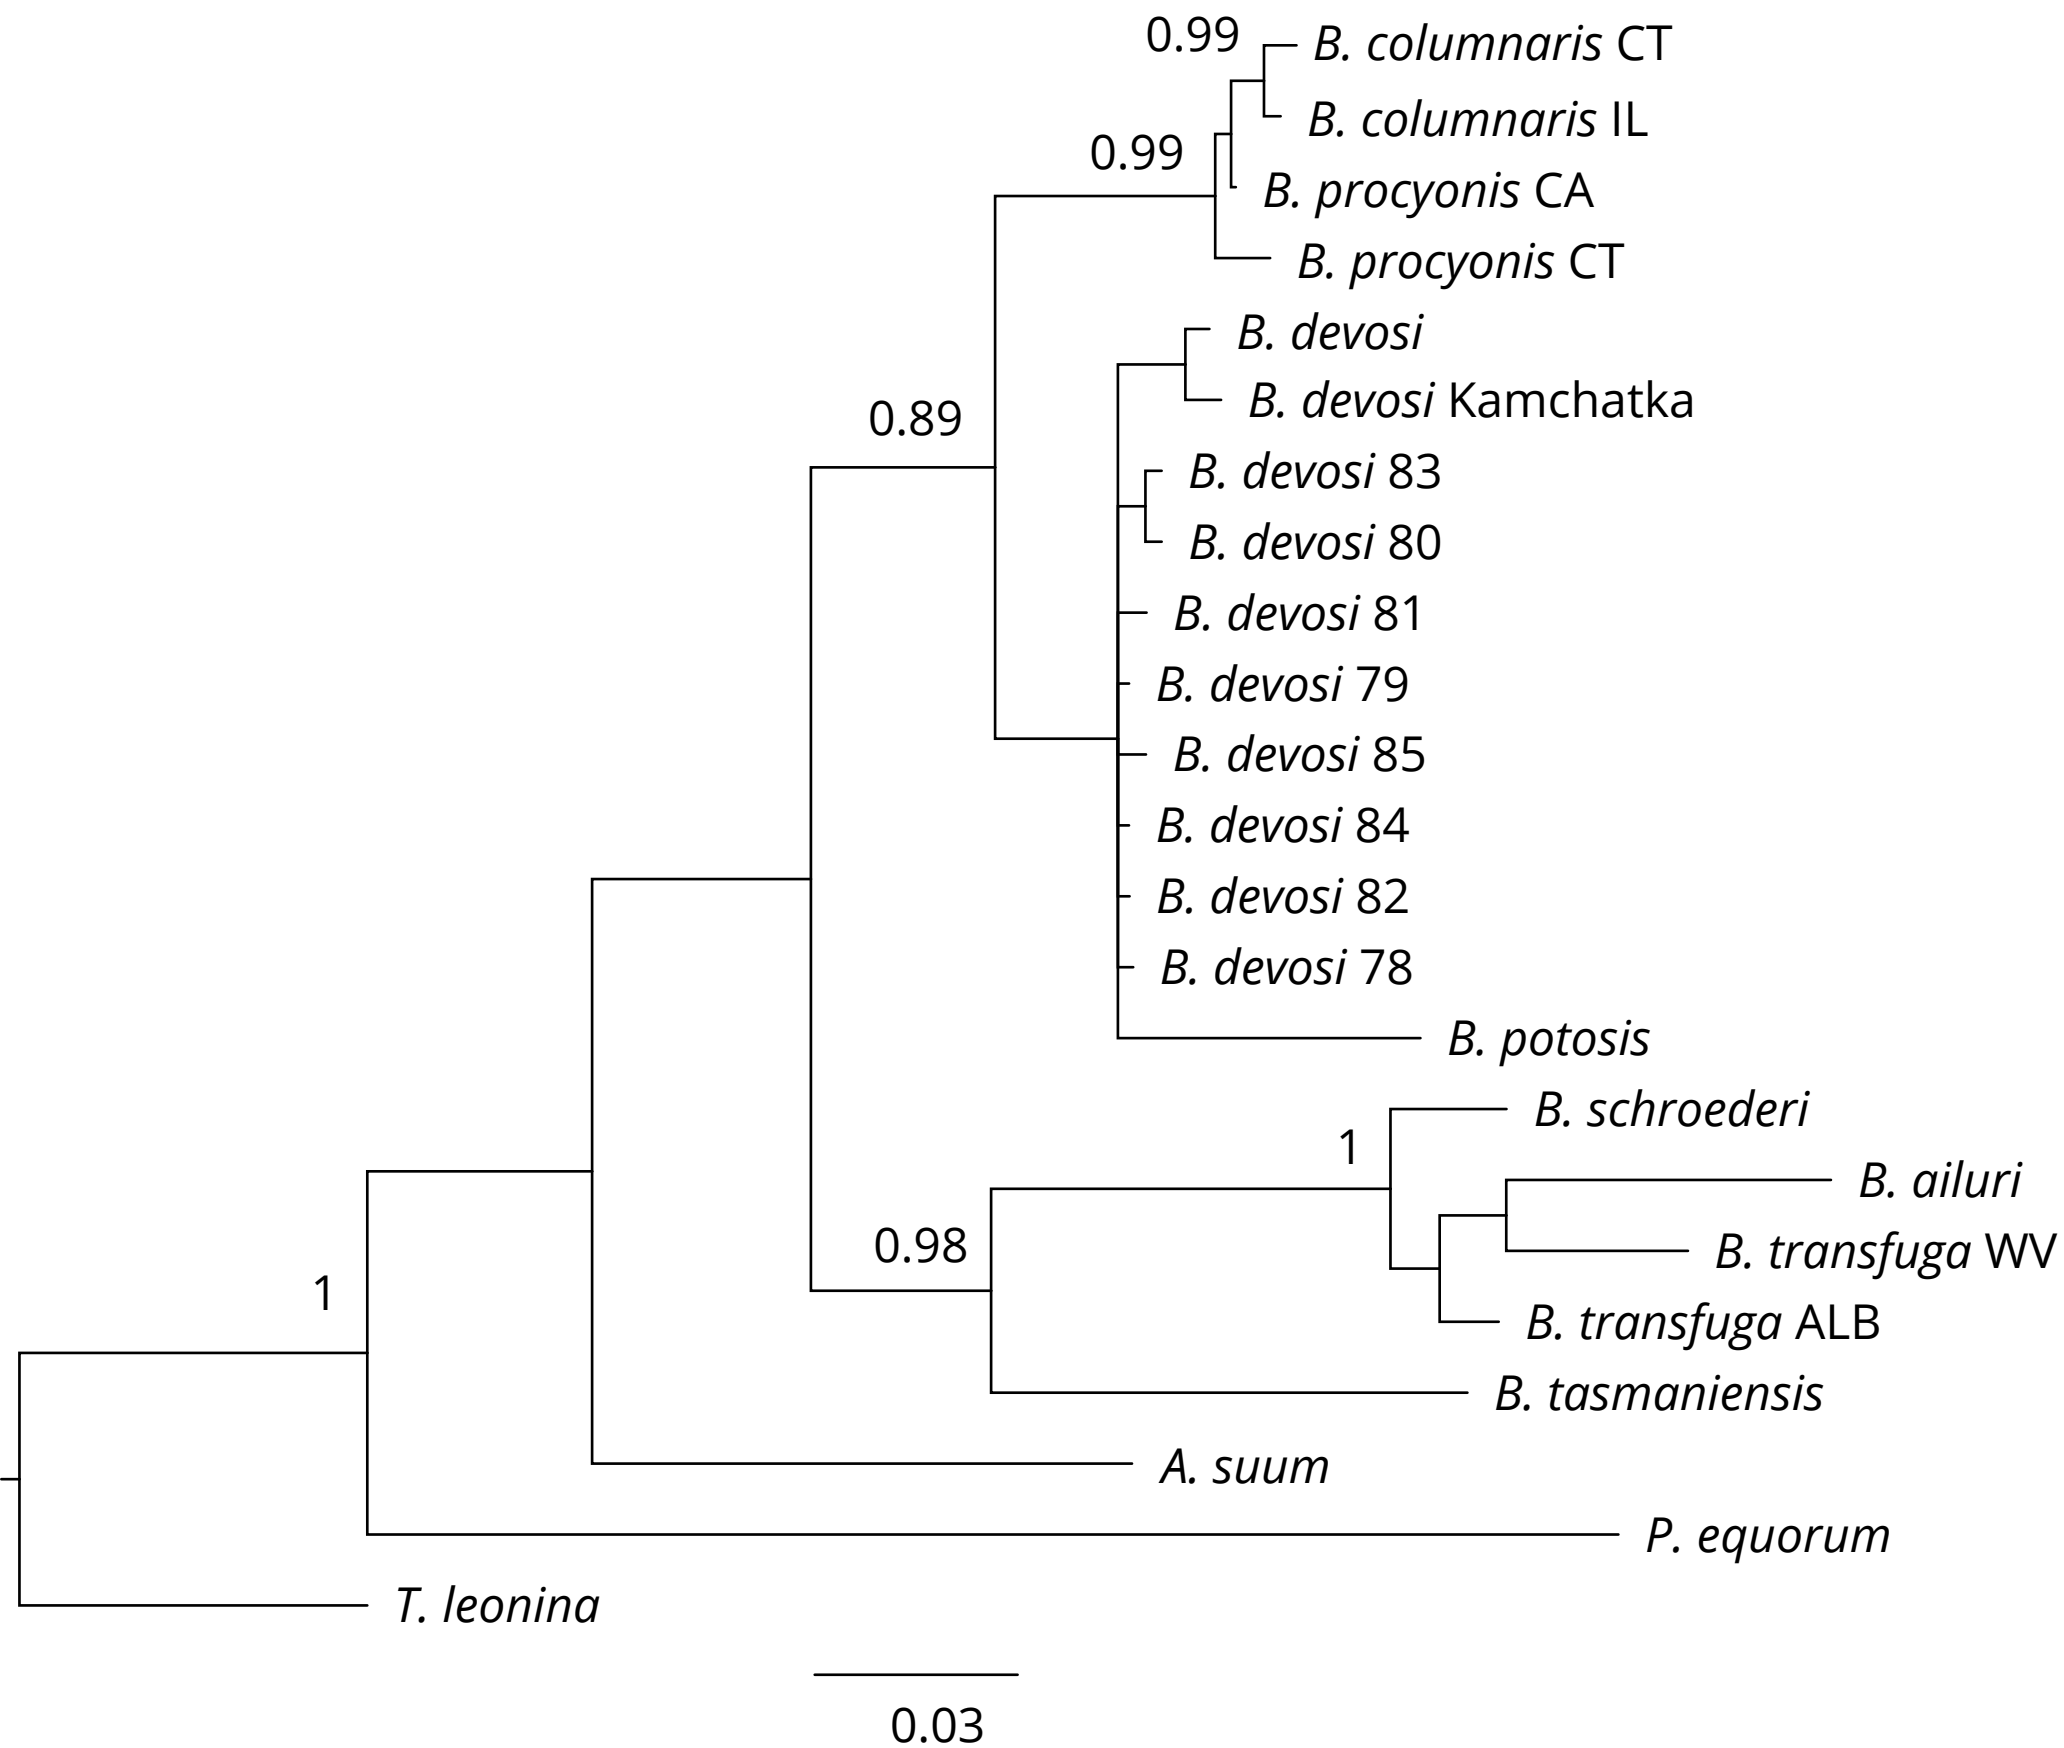

Supplement: mmc3.pdf [file mmc3.pdf]

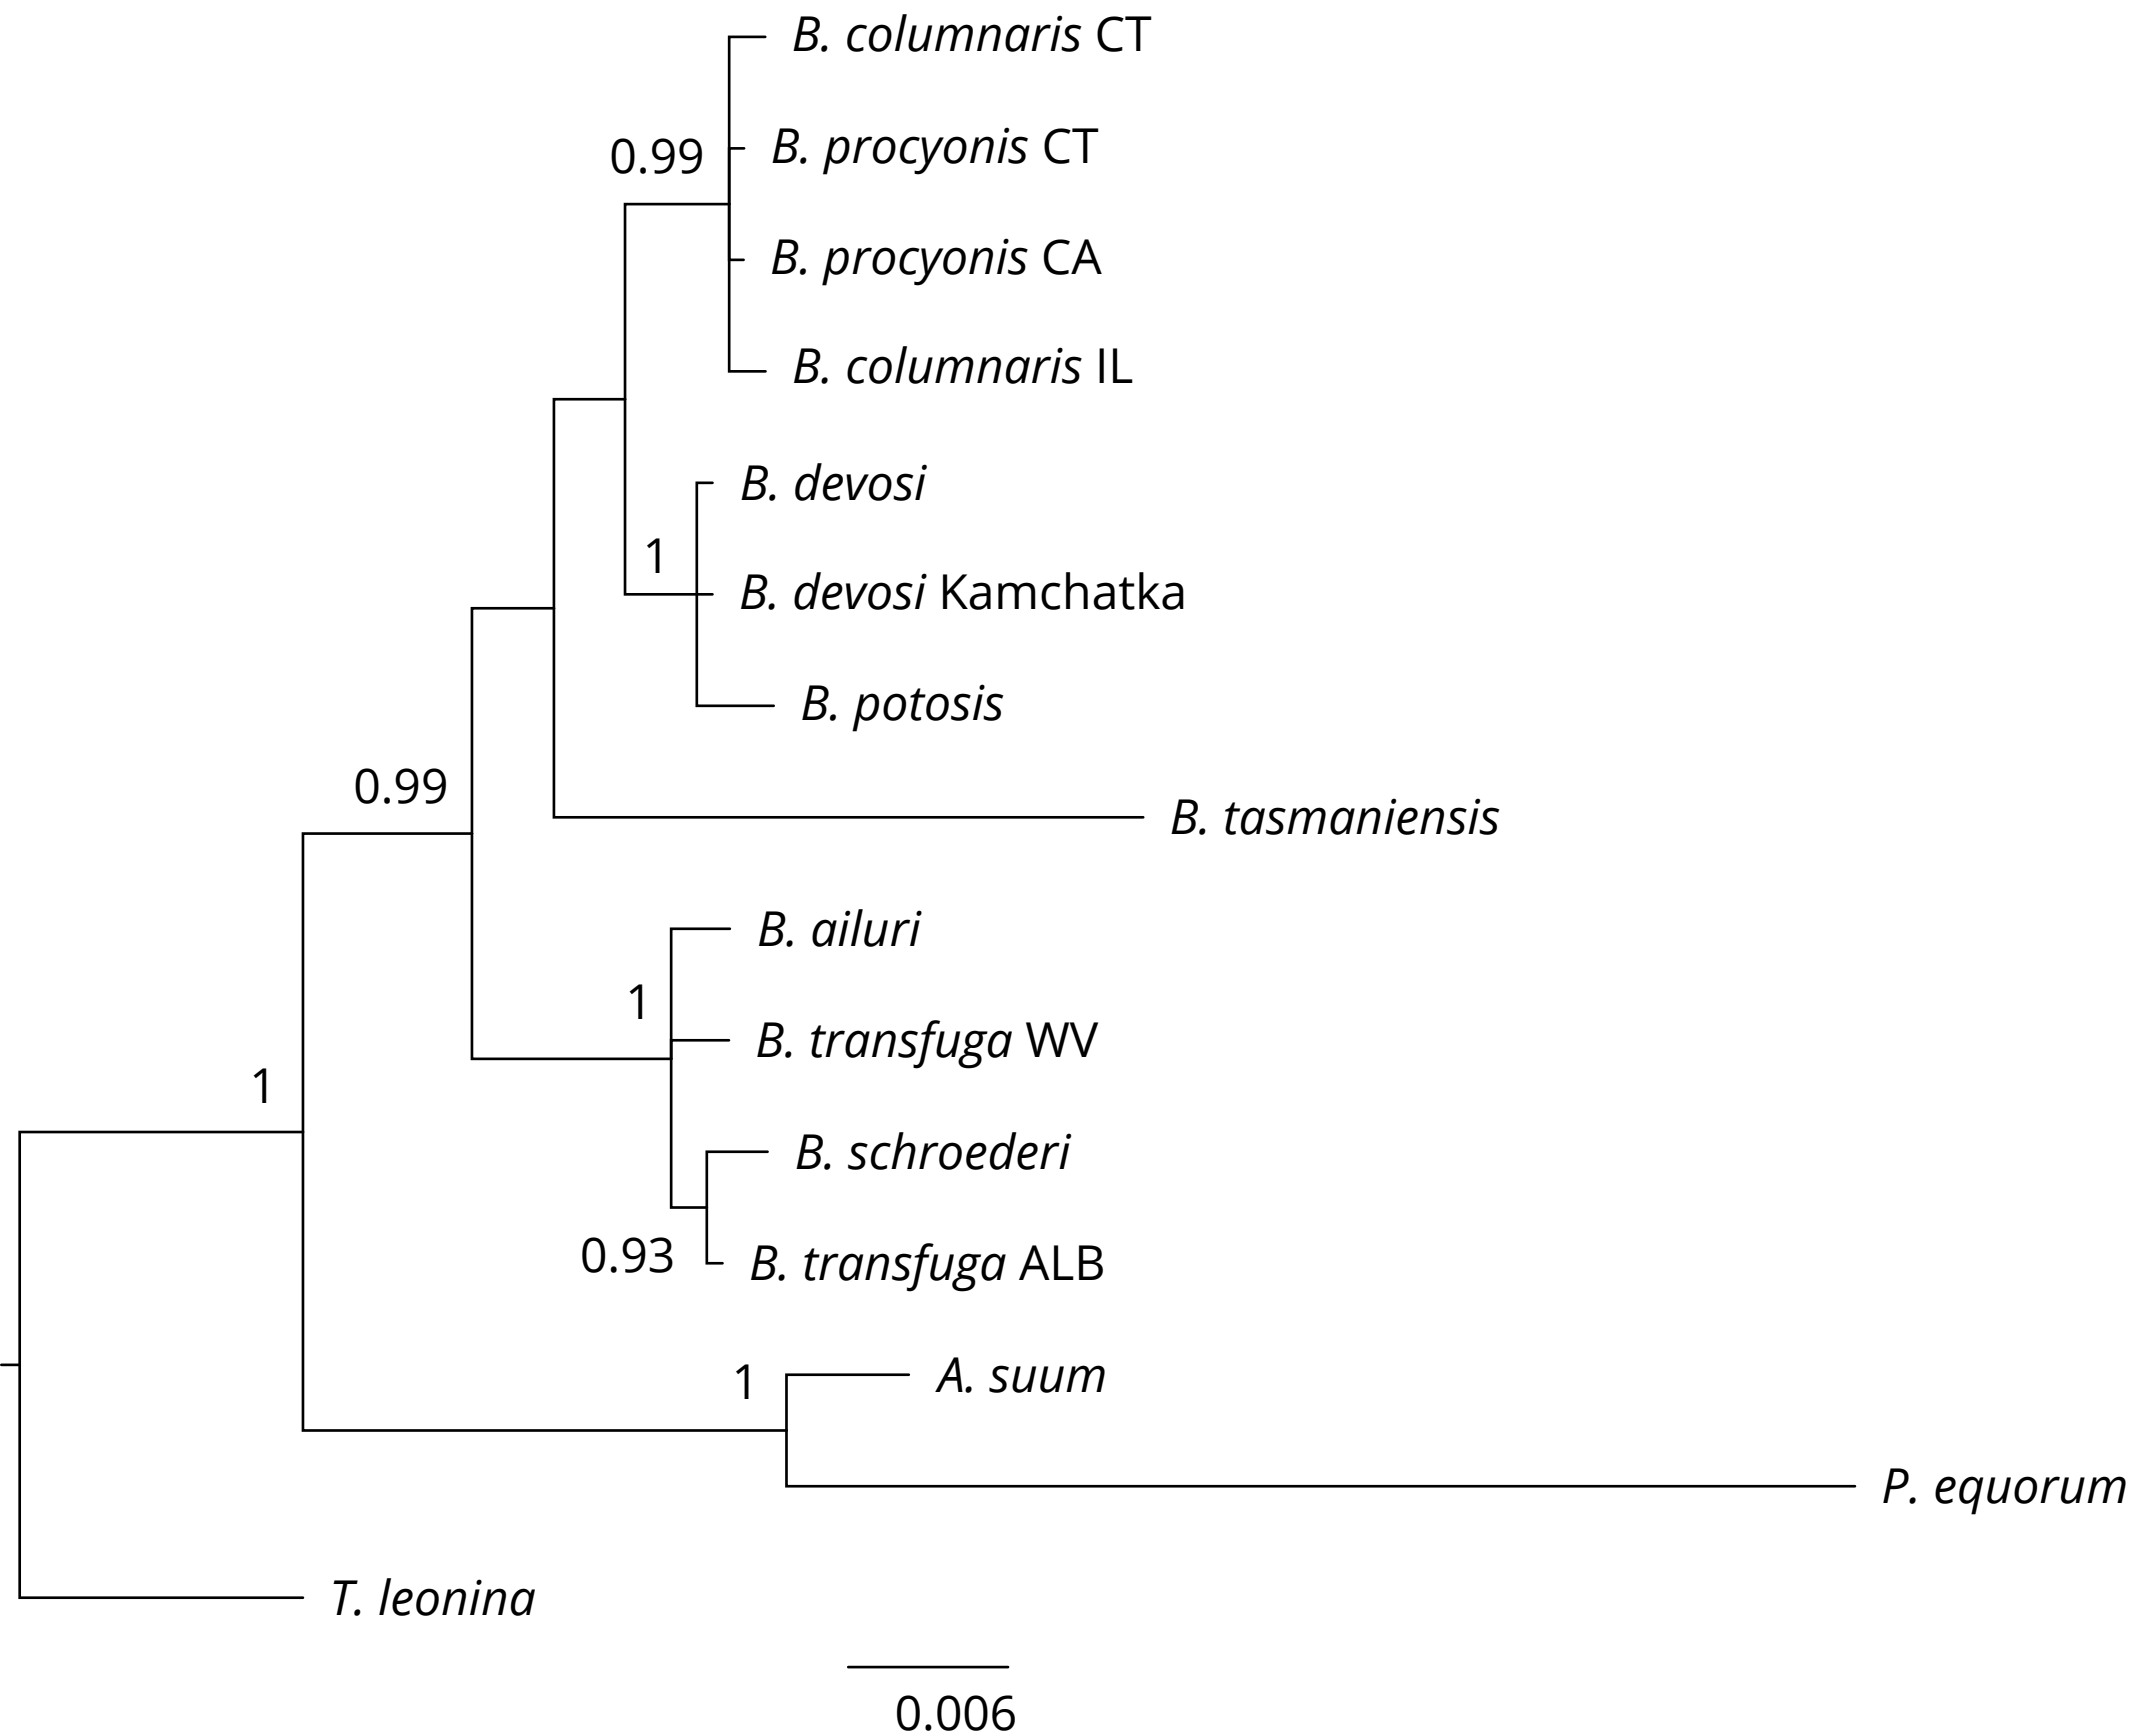

Supplement: mmc4.pdf [file mmc4.pdf]

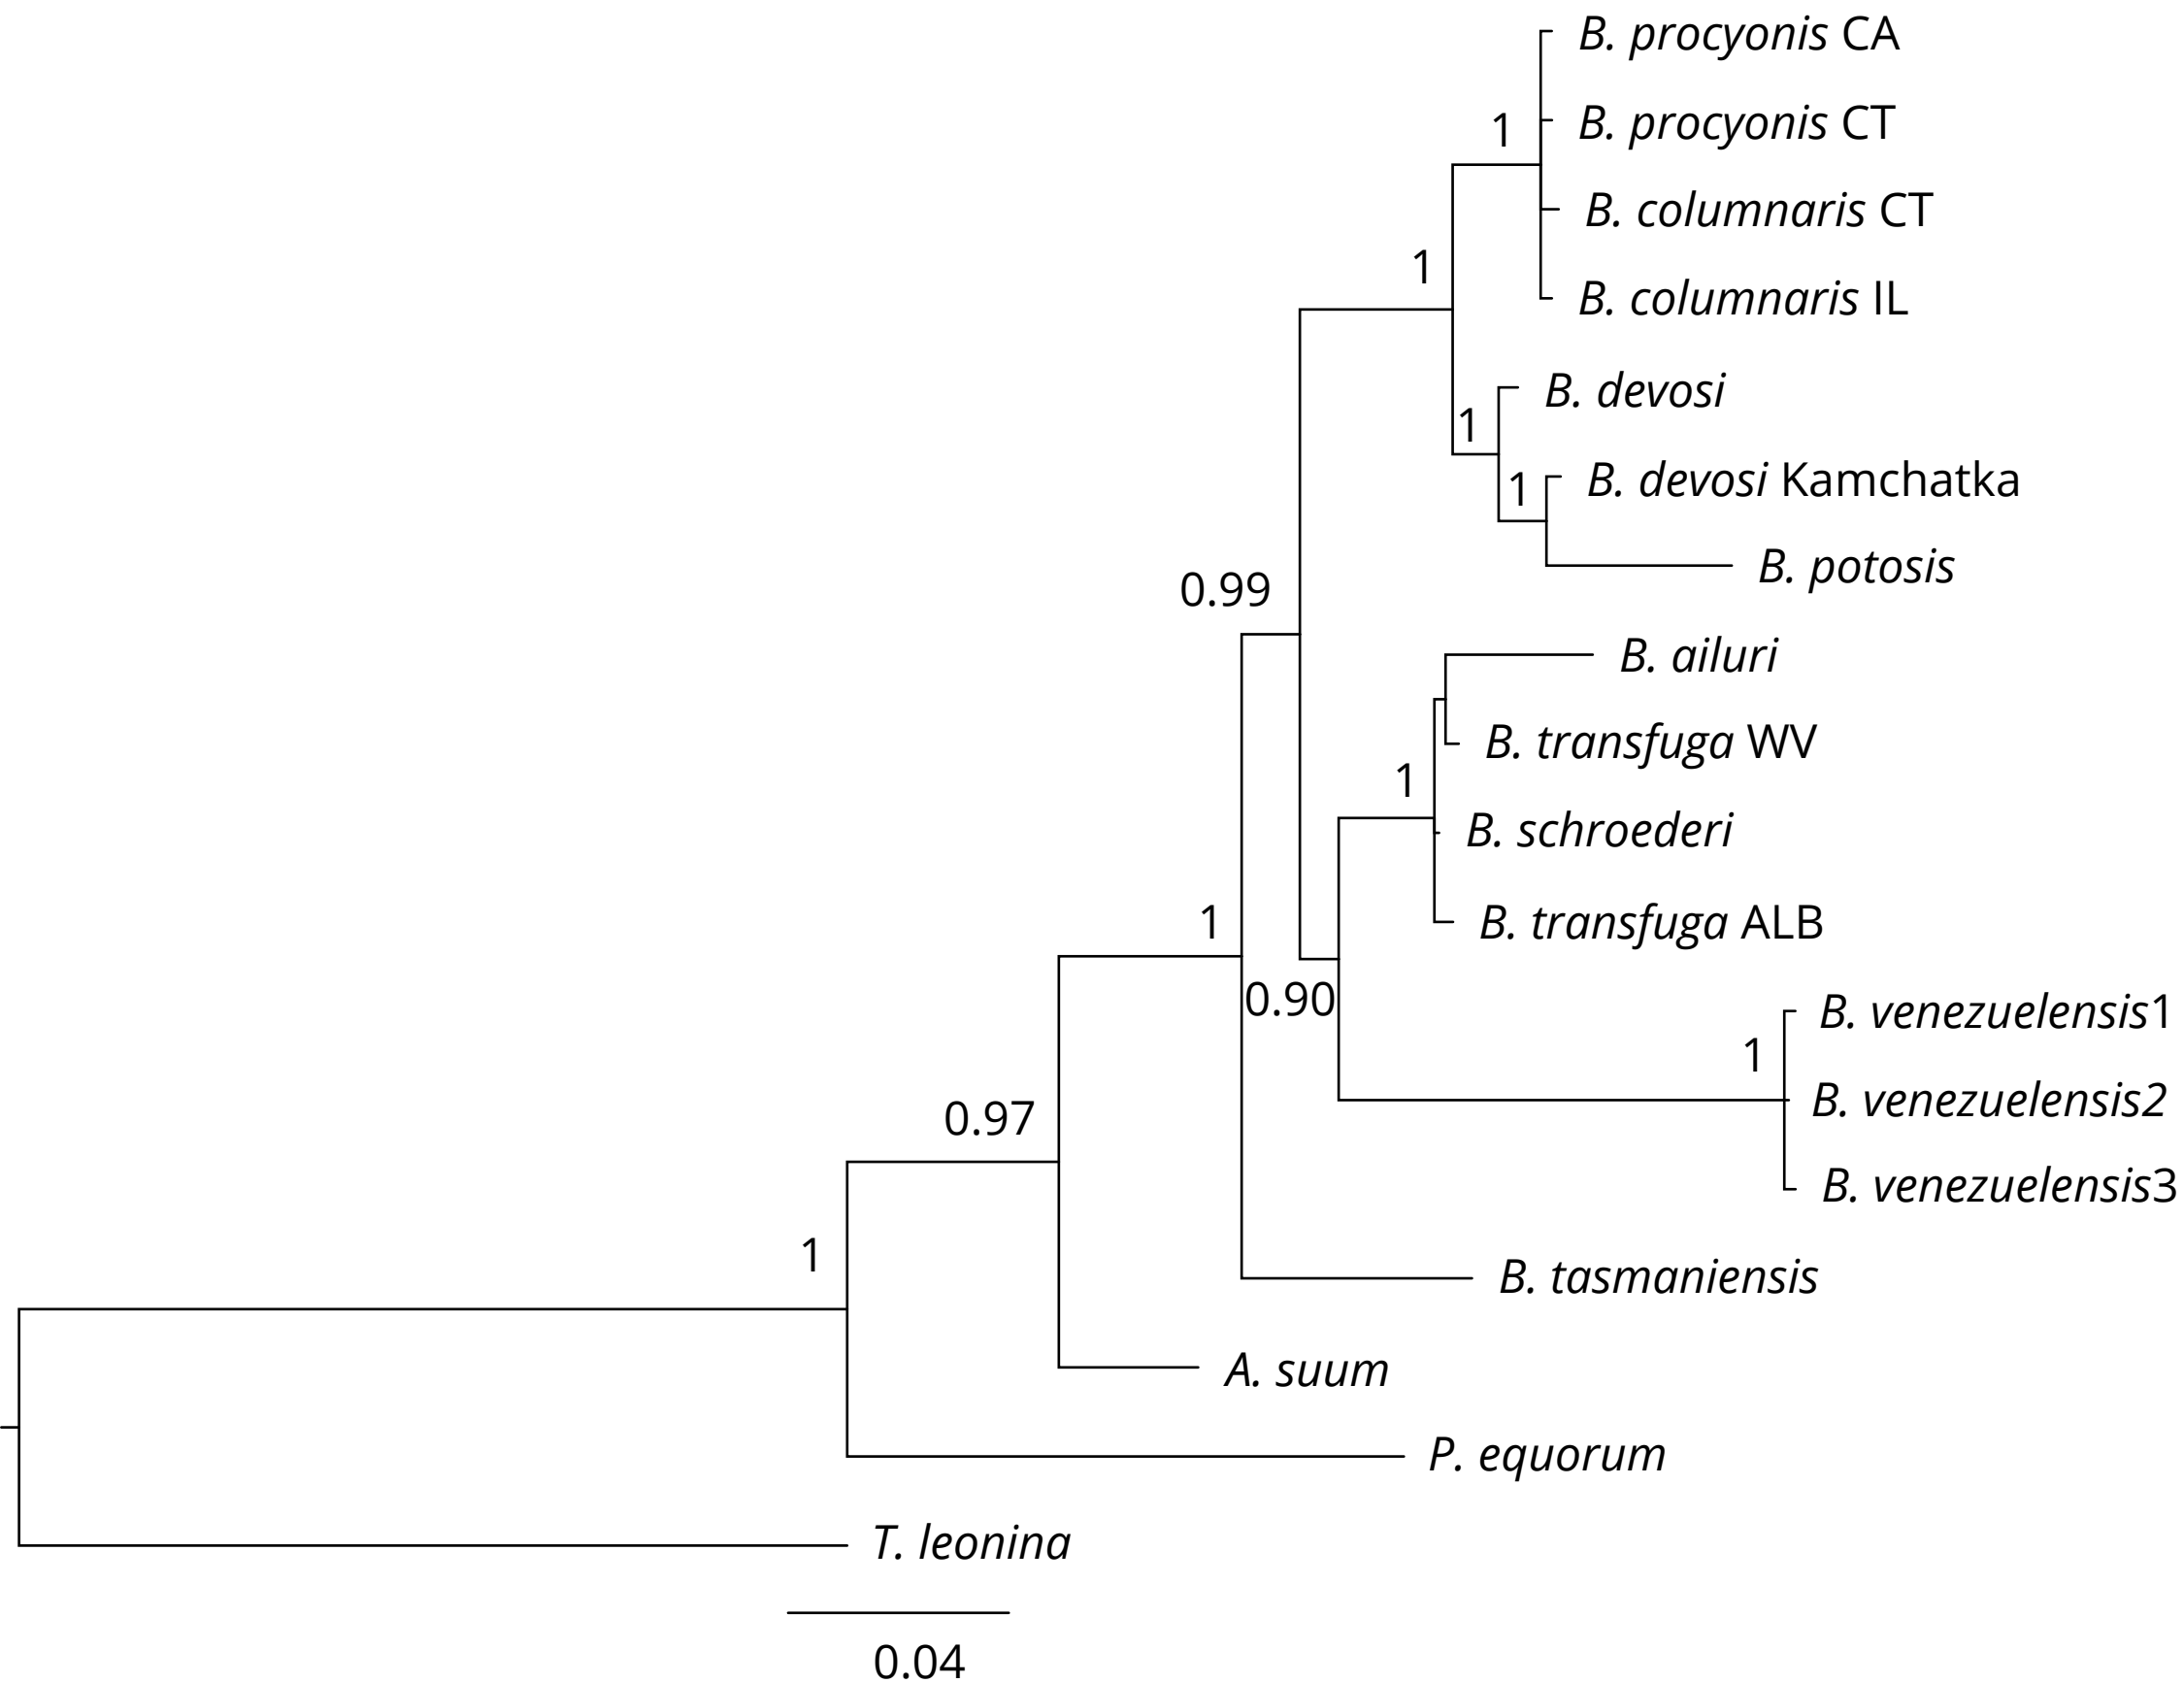

Supplement: mmc5.pdf [file mmc5.pdf]
